# Supplementary material for: Treatment of Aggression in Adults with Autism Spectrum Disorder: A Review
Source: PubMed Central journal article supplement — Harv Rev Psychiatry. 2021 Jan 8;29(1):35–80. doi: 10.1097/HRP.0000000000000282 (PMC7803482; doi:10.1097/hrp.0000000000000282), 2021-01-08
Supplement: hvp-29-35-s002.pdf [file hvp-29-35-s002.pdf]

Supplemental Table 1

## Risk of Bias in Case Studies Examining Treatment of Aggression in Adults with ASD

| Study                                   | Bias involving sequence generation | Bias involving selection of participants | Bias involving blinding of participants and personnel | Bias involving procedural fidelity | Bias involving blinding of outcome assessment | Bias involving selective outcome reporting | Bias involving dependent variable reliability | Bias involving data sampling |
|-----------------------------------------|------------------------------------|------------------------------------------|-------------------------------------------------------|------------------------------------|-----------------------------------------------|--------------------------------------------|-----------------------------------------------|------------------------------|
| Smith (1985) <sup>67</sup>              | High                               | Low                                      | High                                                  | Low                                | High                                          | Low                                        | ?                                             | Low                          |
| Ratey et al. (1987) <sup>68</sup>       | High                               | Low                                      | High                                                  | Low                                | High                                          | Low                                        | ?                                             | Low                          |
| McDougle et al. (1992) <sup>69</sup>    | High                               | Low                                      | High                                                  | Low                                | High                                          | Low                                        | ?                                             | Low                          |
| Koshes & Rock (1994) <sup>70</sup>      | High                               | Low                                      | High                                                  | Low                                | High                                          | Low                                        | ?                                             | Low                          |
| Hillbrand & Scott (1995) <sup>71</sup>  | High                               | Low                                      | High                                                  | Low                                | High                                          | Low                                        | ?                                             | Low                          |
| McDougle et al. (1995) <sup>72</sup>    | High                               | Low                                      | High                                                  | Low                                | High                                          | Low                                        | ?                                             | Low                          |
| McCartney et al. (1999) <sup>73</sup>   | High                               | Low                                      | High                                                  | ?                                  | High                                          | Low                                        | ?                                             | Low                          |
| Gobbi & Pulvirenti (2001) <sup>52</sup> | High                               | Low                                      | ?                                                     | Low                                | ?                                             | Low                                        | ?                                             | Low                          |

Supplemental Table 1

## Risk of Bias in Case Studies Examining Treatment of Aggression in Adults with ASD

| Study                               | Bias involving sequence generation | Bias involving selection of participants | Bias involving blinding of participants and personnel | Bias involving procedural fidelity | Bias involving blinding of outcome assessment | Bias involving selective outcome reporting | Bias involving dependent variable reliability | Bias involving data sampling |
|-------------------------------------|------------------------------------|------------------------------------------|-------------------------------------------------------|------------------------------------|-----------------------------------------------|--------------------------------------------|-----------------------------------------------|------------------------------|
| Raheja et al. (2002) <sup>74</sup>  | High                               | Low                                      | High                                                  | ?                                  | High                                          | Low                                        | ?                                             | Low                          |
| Hasan et al. (2006) <sup>75</sup>   | High                               | Low                                      | High                                                  | Low                                | High                                          | Low                                        | ?                                             | Low                          |
| Shastri et al. (2006) <sup>76</sup> | High                               | Low                                      | ?                                                     | Low                                | ?                                             | Low                                        | ?                                             | Low                          |
| Dratcu et al. (2007) <sup>77</sup>  | High                               | Low                                      | High                                                  | Low                                | High                                          | Low                                        | ?                                             | Low                          |
| Brahm et al. (2008) <sup>78</sup>   | High                               | Low                                      | High                                                  | Low                                | High                                          | Low                                        | ?                                             | Low                          |
| Stigler et al. (2010) <sup>79</sup> | High                               | Low                                      | High                                                  | Low                                | High                                          | Low                                        | ?                                             | Low                          |
| Murphy (2010) <sup>54</sup>         | High                               | Low                                      | High                                                  | ?                                  | High                                          | Low                                        | ?                                             | Low                          |
| Wink et al. (2011) <sup>80</sup>    | High                               | Low                                      | High                                                  | Low                                | High                                          | Low                                        | ?                                             | Low                          |

Supplemental Table 1

Risk of Bias in Case Studies Examining Treatment of Aggression in Adults with ASD

| Study                                 | Bias involving sequence generation | Bias involving selection of participants | Bias involving blinding of participants and personnel | Bias involving procedural fidelity | Bias involving blinding of outcome assessment | Bias involving selective outcome reporting | Bias involving dependent variable reliability | Bias involving data sampling |
|---------------------------------------|------------------------------------|------------------------------------------|-------------------------------------------------------|------------------------------------|-----------------------------------------------|--------------------------------------------|-----------------------------------------------|------------------------------|
| Yanartas et al. (2011) <sup>55</sup>  | High                               | Low                                      | ?                                                     | Low                                | ?                                             | Low                                        | ?                                             | Low                          |
| Richings et al. (2011) <sup>81</sup>  | High                               | Low                                      | ?                                                     | Low                                | ?                                             | Low                                        | ?                                             | Low                          |
| Jordan et al. (2012) <sup>82</sup>    | High                               | Low                                      | High                                                  | Low                                | High                                          | Low                                        | ?                                             | Low                          |
| Petrosino et al. (2016) <sup>83</sup> | High                               | Low                                      | ?                                                     | ?                                  | ?                                             | Low                                        | ?                                             | Low                          |
| Sajith et al. (2017) <sup>84</sup>    | High                               | Low                                      | High                                                  | Low                                | ?                                             | Low                                        | ?                                             | Low                          |

“Low,” low risk of bias  
 “?,” unclear risk of bias  
 “High,” high risk of bias
